# Supplementary material
Source: Springer Nature journal article supplement (https://www.springermedizin.de/resource/supplementary/13012_2010_267_MOESM2_ESM.pdf/9629596)
Supplement: MOESM2 [file 9629596]

## Qualitative data

Interview transcription and documents  
QSR N'VIVO data base

Open-ended coding grid based on OMRU  
and team consensus codebook

First reading and coding round

Coding grid adaptation

Coding quality control (10% of the  
material, 2 independent coders, 85%  
consensus)\*

Second reading and coding by 2  
independent coders

Matrix elaboration for descriptive  
explanation\*\*

## Quantitative data

Survey questionnaire data  
SPSS data base

Descriptive statistics  
(minimum, maximum, mean, SD)

Group comparison  
t-test (interval data)  
Mann-Withney test (ordinal data)  
ANOVA (interval data)

T1-T2 inter group difference

Integration of QUAL + QUANT results

Interpretation and recommendations for decision makers and further research
